# Supplementary material
Source: publisher site journal article supplement (https://www.dovepress.com/article/284248)
Supplement: Supplementary file 1 [file get_supplementary_file.php]

Supplementary material

Figure S1: Prototype of the thigh cuff used for measurement via volume plethysmography


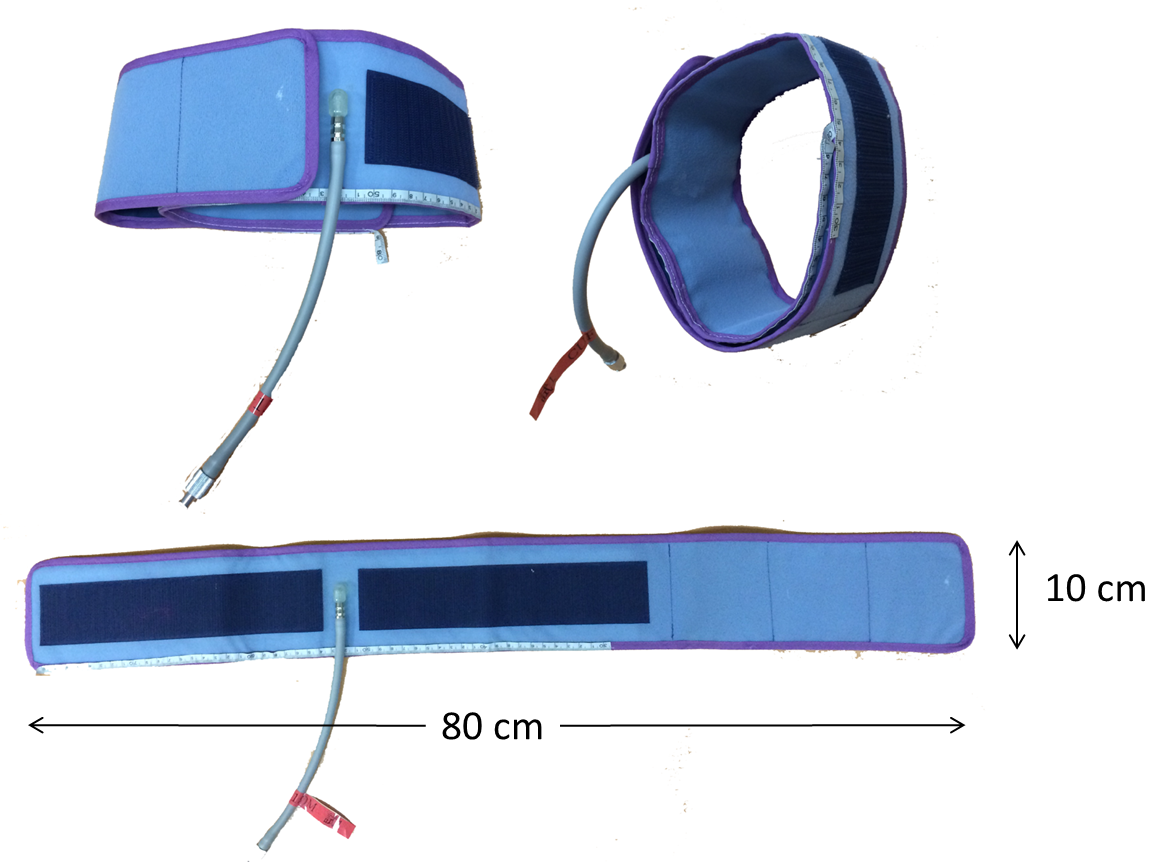


The reliable measurement range of this thigh cuff was the thigh circumference from a minimum of 30 cm to maximum of 75 cm.
